# Supplementary material for: Seawater analysis by ambient mass-spectrometry-based seaomics
Source: Copernicus journal article supplement (doi:10.5194/acp-20-6243-2020), 2020-05-28
Supplement: Supplementary file 1 [file acp-20-6243-2020-supplement.pdf]

Supplement of Atmos. Chem. Phys., 20, 6243–6257, 2020  
<https://doi.org/10.5194/acp-20-6243-2020-supplement>  
© Author(s) 2020. This work is distributed under  
the Creative Commons Attribution 4.0 License.

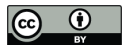

*Supplement of*

## **Seawater analysis by ambient mass-spectrometry-based seaomics**

**Nicolás Zabalegui et al.**

*Correspondence to:* María Eugenia Monge ([maria.monge@cibion.conicet.gov.ar](mailto:maria.monge@cibion.conicet.gov.ar))

The copyright of individual parts of the supplement might differ from the CC BY 4.0 License.

**Table S1.** Information related to sampling conditions, sample salinity, pH and temperature.

| Collection Date<br>(dd/mm/yyyy) | Local Time (hh:mm)                                                 | Observations                                                                                                         | Type of Sample |      |           |                |      |           | Sample ID           |
|---------------------------------|--------------------------------------------------------------------|----------------------------------------------------------------------------------------------------------------------|----------------|------|-----------|----------------|------|-----------|---------------------|
|                                 |                                                                    |                                                                                                                      | ULW            |      |           | SML            |      |           |                     |
|                                 |                                                                    |                                                                                                                      | Salinity [psU] | pH   | Temp [°C] | Salinity [psU] | pH   | Temp [°C] |                     |
| 18/9/2017                       | 11:35-12:00                                                        | Premature discontinuation of sampling                                                                                | 34.1           | 8.14 | 25.0      | -              | -    | -         | ULW GP1 - SML GP1   |
| 20/9/2017                       | 08:32-09:54 (ULW sampling: 09:43)                                  | Sampling with three glass plates manually –<br>At later sampling time: increased occurrence of slick and foam        | 36.3           | 8.12 | 26.7      | 36.2           | 8.11 | 26.7      | ULW GP2 - SML GP2   |
| 26/9/2017                       | 11:00-12:00 (sampling time for 45 min)                             | Catamaran                                                                                                            | 36.2           | 8.04 | 26.1      | 36.4           | 8.05 | 26.1      | ULW CAT3 - SML CAT3 |
| 27/9/2017                       | 8:50-10:03                                                         | Catamaran                                                                                                            | 36.2           | 7.91 | 27.0      | 36.0           | 7.97 | 26.7      | ULW CAT4 - SML CAT4 |
| 2/10/2017                       | 08:30-09:30                                                        | Very windy, ULW sampling was performed on a different place than SML sampling because of the drift                   | 36.0           | 8.17 | 20.9      | 36.5           | 8.26 | 20.9      | ULW GP5             |
| 2/10/2017                       | 08:30-09:30                                                        | Catamaran sampling was interrupted because of the drift, after changing the sampling position sampling was continued | 35.9           | 8.15 | 22.7      | 36.1           | 8.12 | 23.9      | ULW CAT5 - SML CAT5 |
| 3/10/2017                       | 08:15-09:35                                                        | -                                                                                                                    | 36.2           | 8.17 | 23.5      | 36.3           | 8.18 | 22.4      | ULW CAT6 - SML CAT6 |
| 6/10/2017                       | 08:04-08:34 (ULW sampling and 1 L SML)<br>09:02 -09:47 (2 L SML)   | Firstly, premature discontinuation because of seasickness. Went out a second time for more SML sampling              | 36.3           | 8.21 | 23.7      | 36.6           | 8.20 | 20.7      | ULW GP7             |
| 7/10/2017                       | 09:22-09:41 (ULW sampling)<br>09:45-10:35 (SML sampling)           | Smaller and higher waves in change                                                                                   | 36.4           | 8.22 | 21.8      | 36.7           | 8.22 | 21.2      | ULW GP8 - SML GP8   |
| 7/10/2017                       | 09:17-10:46                                                        | -                                                                                                                    | 36.5           | 8.21 | 22.4      | 36.7           | 8.19 | 24.5      | ULW CAT8 - SML CAT8 |
| 9/10/2017                       | 08:30-9:17 (08:30-08:37 ULW sampling;<br>08:40-09:12 SML sampling) | Windy - only manual sampling (no use of the CAT)                                                                     | 36.4           | 8.13 | 23.6      | 36.6           | 8.19 | 21.5      | ULW GP9 - SML GP9   |
| 10/10/2017                      | 08:30-09:30 (09:30-08:40 ULW sampling)<br>08:45-09:30 SML sampling | Windy up to very windy with long waves (but sampling conditions were okay)                                           | 36.3           | 8.18 | 22.4      | 36.4           | 8.19 | 21.7      | ULW GP10 - SML GP10 |

**Table S2.** Chemical standard mixtures used for the analytical method development and for system suitability check prepared in ultrapure water.

| Mix                                           | Compound          | Exact mass | Concentration/ $\mu\text{g mL}^{-1}$ |
|-----------------------------------------------|-------------------|------------|--------------------------------------|
| Amino acids<br>(10 mg/mL)                     | Gly               | 75.0320    | 4                                    |
|                                               | Ala               | 89.0477    |                                      |
|                                               | GABA              | 103.0633   |                                      |
|                                               | Ser               | 105.0426   |                                      |
|                                               | Pro               | 115.0633   |                                      |
|                                               | Val               | 117.0790   |                                      |
|                                               | Thr               | 119.0582   |                                      |
|                                               | Ile               | 131.0946   |                                      |
|                                               | Leu               | 131.0946   |                                      |
|                                               | Asn               | 132.0535   |                                      |
|                                               | Asp               | 133.0375   |                                      |
|                                               | Gln               | 146.0691   |                                      |
|                                               | Glu               | 147.0532   |                                      |
|                                               | Met               | 149.0510   |                                      |
|                                               | His               | 155.0695   |                                      |
|                                               | Phe               | 165.0790   |                                      |
| Arg                                           | 174.1117          |            |                                      |
| Trp                                           | 204.0899          |            |                                      |
| Sugars<br>(100 mg/mL)                         | Xylose            | 150.0528   | 4                                    |
|                                               | Fucose            | 164.0685   |                                      |
|                                               | Galactosamine     | 179.0794   |                                      |
|                                               | Glucose           | 180.0364   |                                      |
|                                               | Mannitol          | 182.0790   |                                      |
| Lipids<br>(MeOH:H <sub>2</sub> O, 3:1<br>v/v) | Decanoic Acid     | 172.1463   | 0.23                                 |
|                                               | Dodecanoic acid   | 200.1776   | 0.06                                 |
|                                               | Octadecanoic acid | 284.2715   | 0.09                                 |
|                                               | Eicosanoic acid   | 312.3028   | 0.25                                 |
|                                               | Docosanoic acid   | 340.3341   | 0.10                                 |

**Table S3.** List of compounds (M1 and M2) and associated  $m/z$  values of adduct ions utilized for the time-of flight calibration with the DART source operated in transmission mode geometry.

| Adduct Ion             | M1                                | M2                                | $m/z$    |
|------------------------|-----------------------------------|-----------------------------------|----------|
| [M1-H] <sup>-</sup>    | 2-Cyanoguanidine                  | -                                 | 83.0363  |
| [M1-H] <sup>-</sup>    | Maleic acid                       | -                                 | 115.0037 |
| [M1-H] <sup>-</sup>    | Mercaptosuccinic acid             | -                                 | 148.9914 |
| [M1-H] <sup>-</sup>    | 2-Amino-4,5-dimethoxybenzoic acid | -                                 | 196.0615 |
| [M1-H] <sup>-</sup>    | Lacosamide                        | -                                 | 249.1245 |
| [M1+M2-H] <sup>-</sup> | 2-Cyanoguanidine                  | 2-Amino-4,5-dimethoxybenzoic acid | 280.1051 |
| [M1-H] <sup>-</sup>    | Enalapril                         | -                                 | 375.1925 |
| [M1-H] <sup>-</sup>    | Flecainide                        | -                                 | 413.1305 |
| [M1+Cl] <sup>-</sup>   | Flecainide                        | -                                 | 449.1072 |
| [M1+M2-H] <sup>-</sup> | Flecainide                        | Maleic acid                       | 529.1415 |
| [M1+M2-H] <sup>-</sup> | Flecainide                        | 2-Amino-4,5-dimethoxybenzoic acid | 610.1993 |
| [M1+M2-H] <sup>-</sup> | Enalapril                         | Lacosamide                        | 625.3243 |
| [2M1-H] <sup>-</sup>   | Enalapril                         | -                                 | 751.3923 |
| [M1+M2-H] <sup>-</sup> | Flecainide                        | Enalapril                         | 789.3303 |

**Table S4.** Fold change analysis for discriminant features. Wilcoxon Paired Signed Rank Test was used to compare SML with ULW samples. Features with  $p < 0.05$  are highlighted in bold; enrichment in SML is highlighted in red and in ULW in green.

| Feature Code | Fold Change SML/ULW |            |            |            |            |            |            |            |            |            |                          | Trend |
|--------------|---------------------|------------|------------|------------|------------|------------|------------|------------|------------|------------|--------------------------|-------|
|              | GP1                 | GP2        | CAT3       | CAT4       | GP8        | GP9        | GP10       | CAT5       | CAT6       | CAT8       | Median of paired SML/ULW |       |
| 4            | 0.9                 | 0.9        | 1.1        | 0.9        | 0.9        | 0.8        | 1.1        | 0.9        | 1.1        | 1.1        | 0.9                      | ↓     |
| 5            | 1                   | 1.2        | 0.9        | 0.8        | 1.2        | 0.8        | 1.5        | 1.1        | 1.5        | 1.4        | 1.2                      | ↑     |
| <b>17</b>    | <b>1.2</b>          | <b>1.1</b> | <b>1.3</b> | <b>1.2</b> | <b>1</b>   | <b>1.1</b> | <b>1.5</b> | <b>1</b>   | <b>1.5</b> | <b>1.3</b> | <b>1.2</b>               | ↑     |
| 21           | 0.9                 | 1.1        | 0.4        | 2.3        | 0.8        | 1.1        | 1.4        | 1.4        | 1.4        | 1.1        | 1.1                      | ↑     |
| <b>25</b>    | <b>0.9</b>          | <b>0.9</b> | <b>0.7</b> | <b>0.4</b> | <b>0.9</b> | <b>0.5</b> | <b>0.8</b> | <b>0.7</b> | <b>1.2</b> | <b>1.1</b> | <b>0.9</b>               | ↓     |
| 28           | 1.4                 | 1.3        | 0.6        | 0.8        | 1          | 0.9        | 1.2        | 0.9        | 1.3        | 1          | 1.1                      | ↑     |
| <b>31</b>    | <b>1.2</b>          | <b>1.3</b> | <b>1.2</b> | <b>0.9</b> | <b>1.1</b>               | ↑     |
| <b>33</b>    | <b>1.5</b>          | <b>1.2</b> | <b>1</b>   | <b>1.1</b> | <b>1.1</b> | <b>1.2</b> | <b>1.2</b> | <b>1.2</b> | <b>1</b>   | <b>1</b>   | <b>1.2</b>               | ↑     |
| 34           | 1.1                 | 1          | 0.5        | 2.5        | 0.7        | 0.9        | 1.1        | 1          | 1.4        | 1.1        | 1.1                      | ↑     |
| 43           | 1                   | 1.7        | 1          | 0.8        | 0.9        | 1          | 0.7        | 0.9        | 0.8        | 0.8        | 0.9                      | ↓     |
| <b>49</b>    | <b>0.7</b>          | <b>0.6</b> | <b>1.1</b> | <b>0.6</b> | <b>0.9</b> | <b>0.6</b> | <b>0.7</b> | <b>0.6</b> | <b>1.1</b> | <b>1</b>   | <b>0.7</b>               | ↓     |

**Table S5.** Putative identification of features with loading values associated to PC2 higher than 0.25 (Fig. S8 A and B). Normalized average intensity values are indicated for SML samples analyzed with both the lab-to-the-field approach and TM-DART-QTOF-MS.

| Feature # | Feature (m/z) | Putative ID                       | No SOA formation |       |       | SOA formation |       |
|-----------|---------------|-----------------------------------|------------------|-------|-------|---------------|-------|
|           |               |                                   | CAT3             | CAT4  | CAT6  | CAT8          | GP10  |
| 13        | 439.3164      | -                                 | 1.4              | 1.2   | 1.7   | 2.3           | 1.9   |
| 28        | 639.4312      | Boron-containing organic compound | 7.0              | 6.6   | 7.3   | 11.0          | 8.0   |
| 29        | 639.5013      | Boron-containing organic compound | 6.6              | 6.8   | 6.9   | 8.5           | 8.2   |
| 32        | 667.4628      | Boron-containing organic compound | 3.2              | 3.0   | 3.2   | 4.5           | 3.6   |
| 33        | 667.5346      | Boron-containing organic compound | 139.8            | 128.8 | 131.8 | 160.2         | 160.4 |
| 38        | 698.5176      | -                                 | 9.8              | 9.5   | 11.0  | 12.3          | 13.7  |
| 42        | 726.5480      | -                                 | 14.1             | 14.1  | 16.1  | 17.3          | 19.1  |

**Figure S1.** Irradiation spectrum measured at the quartz reactor illuminated by UV and pen ray lamps

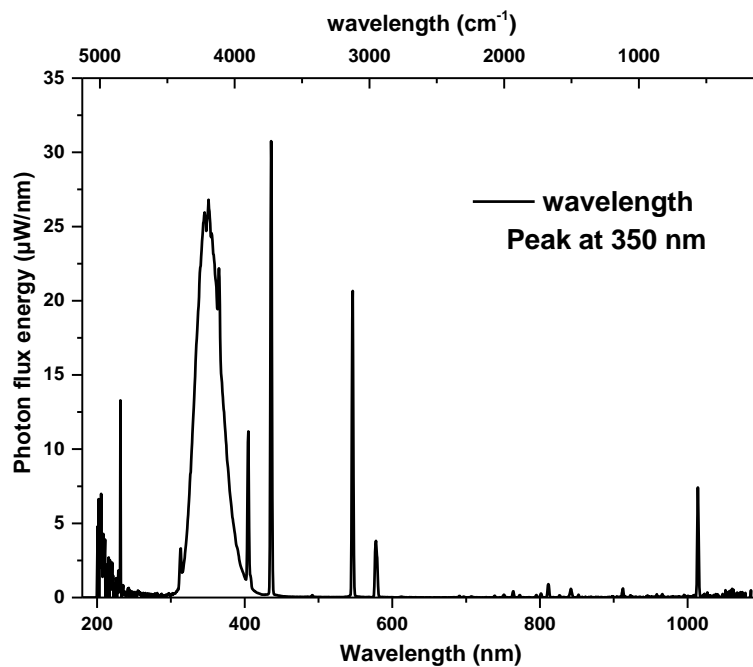

**Figure S2:** Schematic setup of the PAM chamber (OFR<sub>254</sub>) system deployed in this marine air photochemistry field study. Solid lines show the flow chart for particle formation potency from the sea surface microlayer (SML) interfacial photochemical production.

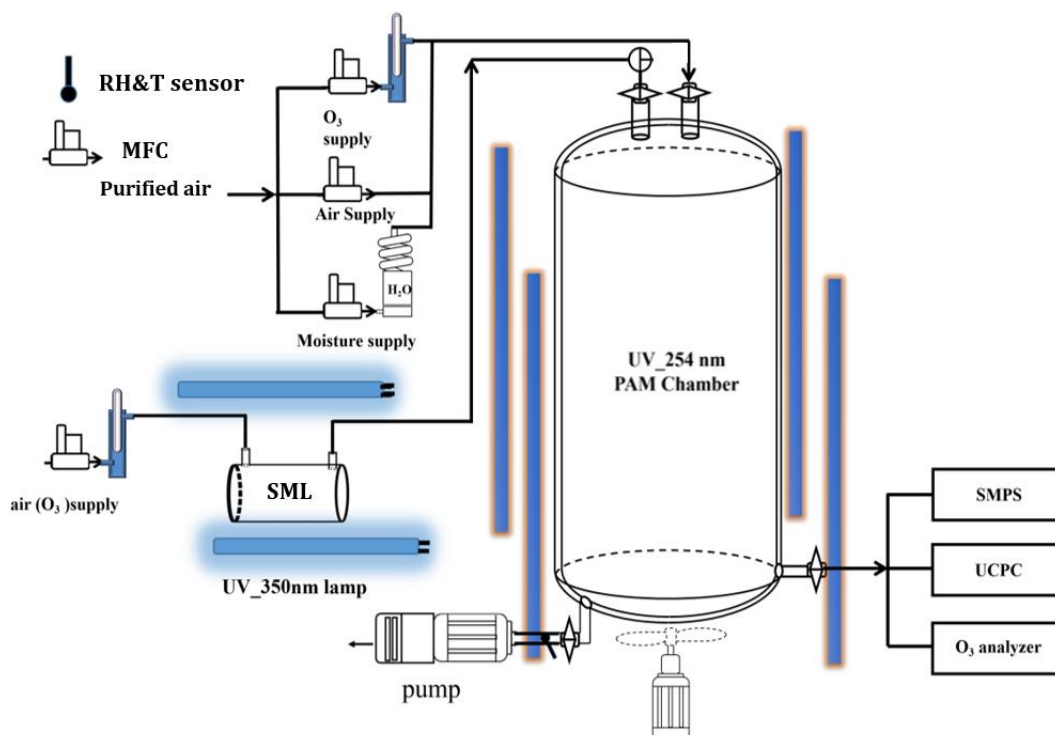



## Supporting Text 1. Oxidation flow reactor (OFR)

The Potential Aerosol Mass (PAM) oxidation flow reactor (OFR) is now commonly used in atmospheric chemistry to study the aging of a given air mass, and to investigate aerosol formation and aging. Operational principles and applications of the OFR have been described in previous works (Palm et al., 2016; Saukko et al., 2012). Briefly, the OFR in this study is equipped with 254 nm UV light, hereafter named as OFR<sub>254</sub>. The OFR<sub>254</sub> (GoPAM 2) is different from general Aerodyne OFR, which is made completely of coated aluminum walls with the UV lamps inserted inside the chamber (Kang et al., 2011; Li et al., 2015). This OFR<sub>254</sub> consists of a vertical cylindrical quartz tube (length: 95 cm, ID: 12.4 cm) with an internal volume of approximately 11.5 L. Two controllable low-pressure mercury UVA lamps (Philips, Inc.) with characteristic output spectra at 254 nm are vertically mounted surrounding the high-transmission tube. The tube and lamps are sealed in an aluminum box, with continuous ventilation to prevent heating. Two inlets allow introducing the auxiliary gases (e.g., N<sub>2</sub>/air, moisture, O<sub>3</sub>, etc.) and ambient/sample air (e.g., SO<sub>2</sub>, VOCs, etc), separately. A static mixer at the top of the reactor enables uniform mixing of the auxiliary gases and sample air before flowing through the OFR<sub>254</sub>. Residence time (RT) inside this reactor is 137 s for a laminar flow (Reynold's number  $\sim 57.1 < 2000$ ) at 5 LPM. OH radicals in the OFR<sub>254</sub> can be produced through photolysis of O<sub>3</sub> and further reaction of singlet oxygen (O<sup>1</sup>D) with moisture. Detailed pathways for OH radical production are presented below:

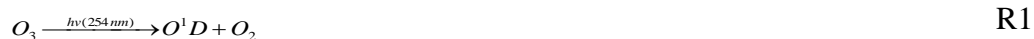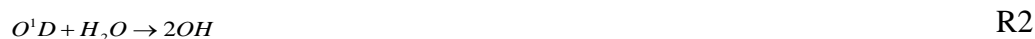

The OFR<sub>254</sub> requires the addition of an external O<sub>3</sub> source. Initial O<sub>3</sub> concentration, water vapor density, UV light intensity and RT strongly influence the chemistry in the OFR. The complicated radical chemistry in the OFR<sub>254</sub> (e.g., OH radical dominated oxidation pathways over O<sub>3</sub>, HO<sub>2</sub>, and RO<sub>2</sub> reactions) can be simply characterized as OH exposure (OH<sub>exp</sub>), which works as a vital parameter to denote the oxidation level of the sample. OH exposure is defined as an integration of the reactive OH radical density with residence time in the OFR. Simulations confirm the complex correlation of OH<sub>exp</sub> with many variables including external total OH reactivity (OHR<sub>ext</sub> =  $\sum k_i \times [R_i]$ , where  $k_i$  and  $[R_i]$  are the reaction kinetic constant with OH and the concentration of the OH-consuming reactant in the system), humidity, RT, UV light intensity, and initial O<sub>3</sub> or/and static endpoint O<sub>3</sub>. Some non-linear mathematical functions containing all these variables have been proposed to estimate the OH<sub>exp</sub> (Aerodyne OH<sub>exp</sub> estimator) (Peng et al., 2015). To be convenient, most studies apply some reactive tracers (e.g., SO<sub>2</sub>, CO,

target VOCs) to measure or to constrain the  $\text{OH}_{\text{exp}}$  by measuring their first-order decay in OFR via Equation 1:

$$\text{OH}_{\text{exp}} = \frac{1}{k} \ln\left(\frac{C_0}{C}\right) \quad [1]$$

where  $k$  is the second-order rate constant with OH radical in gas phase,  $C_0$  and  $C$  are initial and final concentrations of the chemical tracer. We followed the mathematical models suggested by Li et al. (2015) and Peng et al. (2015) to retrieve the operational function for our OFR<sub>254</sub>.  $\text{OH}_{\text{exp}}$  was explored over a wide range of conditions in the laboratory, and the  $\text{OH}_{\text{exp}}$  estimation functions were retrieved and shown in Equation 2 and 3 below, corresponding to one and two UV lamps full-power irradiation.

$$\log(\text{OH exp}) = 1.732 + 0.79292 \times \log(\text{RH}) + 0.023076 \times \log(\text{RH})^2 + 0.978 \times \log(\text{RT}) - \log\left\{1 + \exp\left[\frac{-1.22 - \log(\text{O}_3 / \text{OHR})}{0.421}\right]\right\} \quad [2]$$

$$\log(\text{OH exp}) = 1.991 + 0.79292 \times \log(\text{RH}) + 0.023076 \times \log(\text{RH})^2 + 0.978 \times \log(\text{RT}) - \log\left\{1 + \exp\left[\frac{-1.22 - \log(\text{O}_3 / \text{OHR})}{0.41}\right]\right\} \quad [3]$$

The  $\text{OH}_{\text{exp}}$  estimated based on equations 2 and 3 was compared against the  $\text{OH}_{\text{exp}}$  measured from the  $\text{SO}_2$  decay, and the results are shown in Figure S3, where it is clear that the estimated  $\text{OH}_{\text{exp}}$  data points are within a factor of 1 from the measured  $\text{OH}_{\text{exp}}$ .  $\text{OH}_{\text{exp}}$  can be converted to equivalent days of OH radicals initiated atmospheric aging by dividing by a 24 h average ambient concentration of  $1.5 \times 10^6 \text{ molec cm}^{-3}$  OH. It should be noted that in air with high oxidation capacity, like remote oceanic areas, average OH radical density can be up to  $9 \times 10^6 \text{ molec cm}^{-3}$  (Carpenter et al., 2010). Therefore, to account for the extreme levels of OH radicals,  $\text{OH}_{\text{exp}}$  in this campaign was stepped over a wide range by adjusting light intensity and also external ozone concentration.

**Figure S3.** Comparison of OH exposure ( $\text{OH}_{\text{exp}}$ ) estimated from Equations 2 and 3 vs. the measured  $\text{OH}_{\text{exp}}$  results. 1:1, 1:2, 2:1, 1:4, and 4:1 lines are shown to facilitate the comparison.

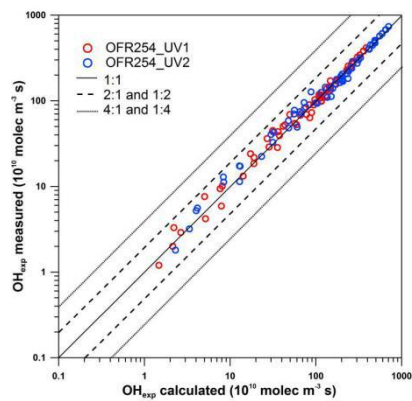

**Figure S4:** Experimental design for depositing samples in the mesh.

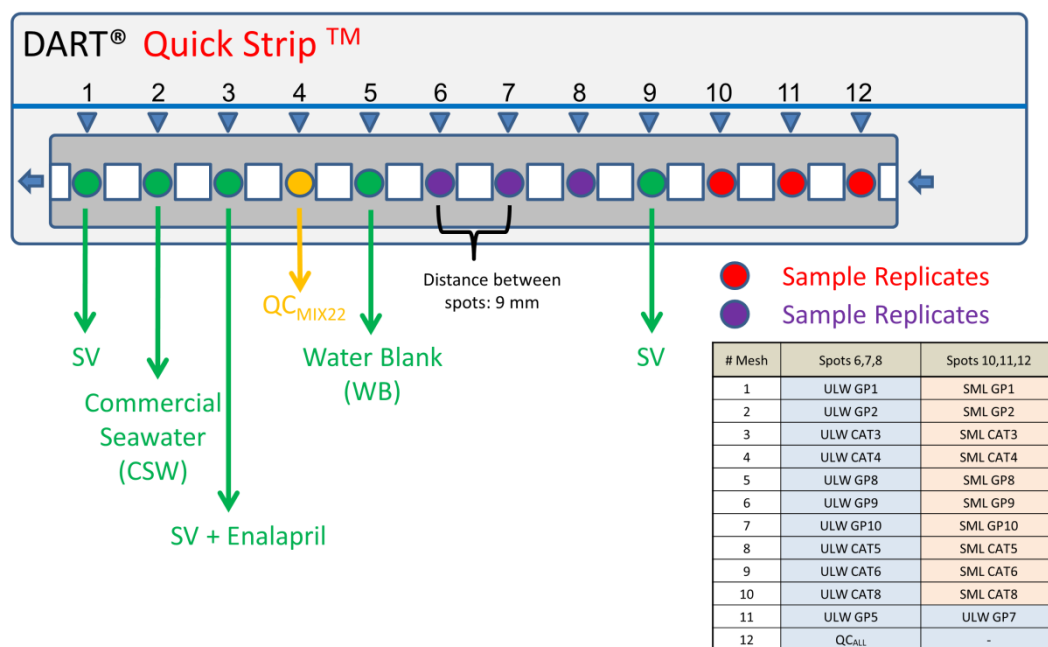

**Figure S5:** t-SNE plot for replicate SML and ULW samples.

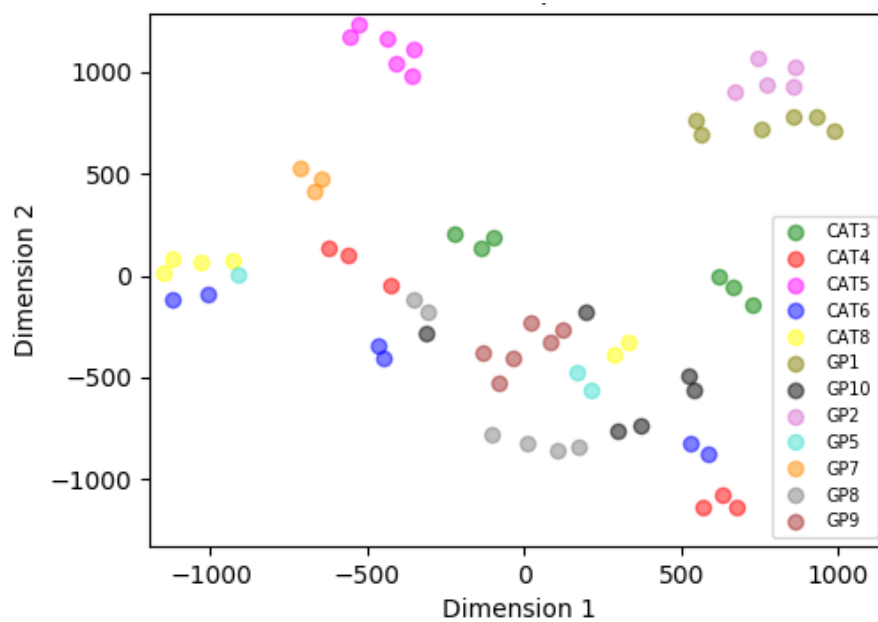

**Figure S6.** TM-DART-QTOF-MS continuum spectra of discriminant features. Peaks from the isotopic pattern are indicated with arrows and feature codes are indicated between brackets (Table 1).

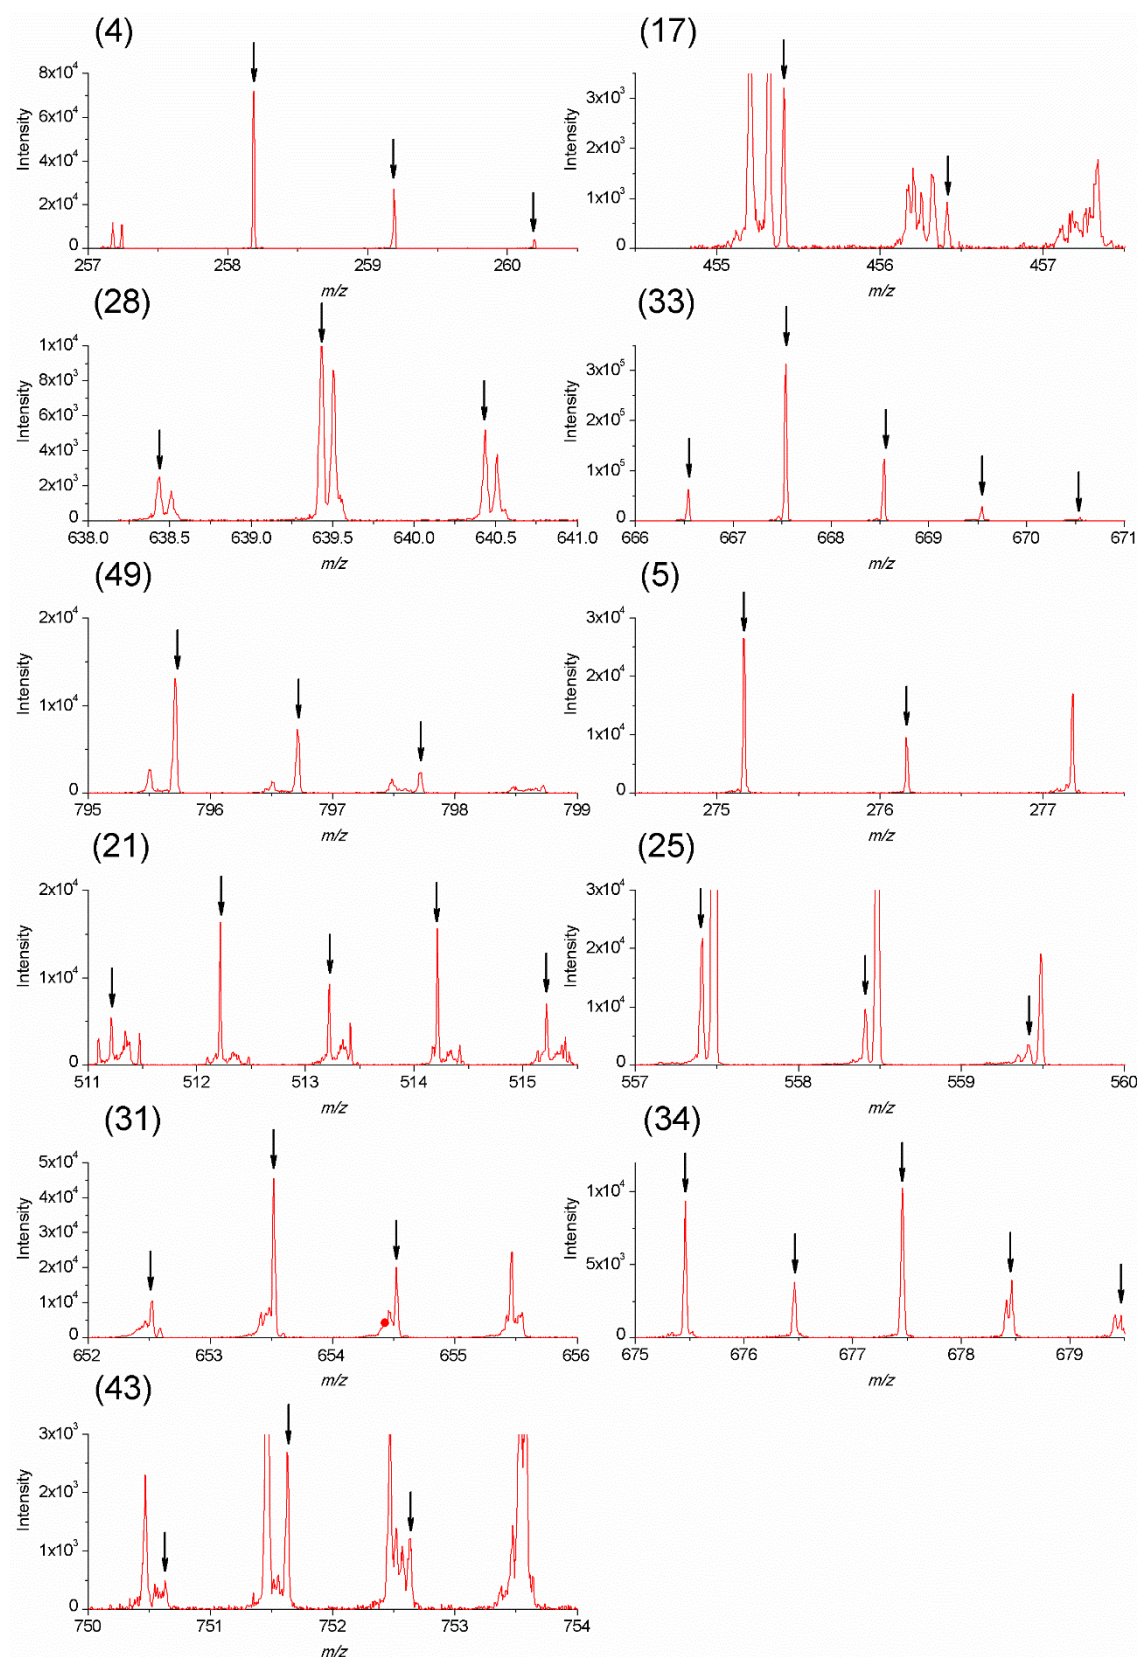

**Figure S7:** (a) Mass spectrum of a 0.32 mM 4-bromo-phenol solution in acetonitrile obtained using TM-DART-QTOF-MS. (b) Tandem MS spectrum for the precursor ion at  $m/z$  170.9456 using 10 V in the collision cell for fragmentation and a quadrupole selection window of 1 Da. (c) Mass spectrum of a saturated acetonitrile solution with KBr and 2 mM phenol obtained using TM-DART-QTOF-MS.

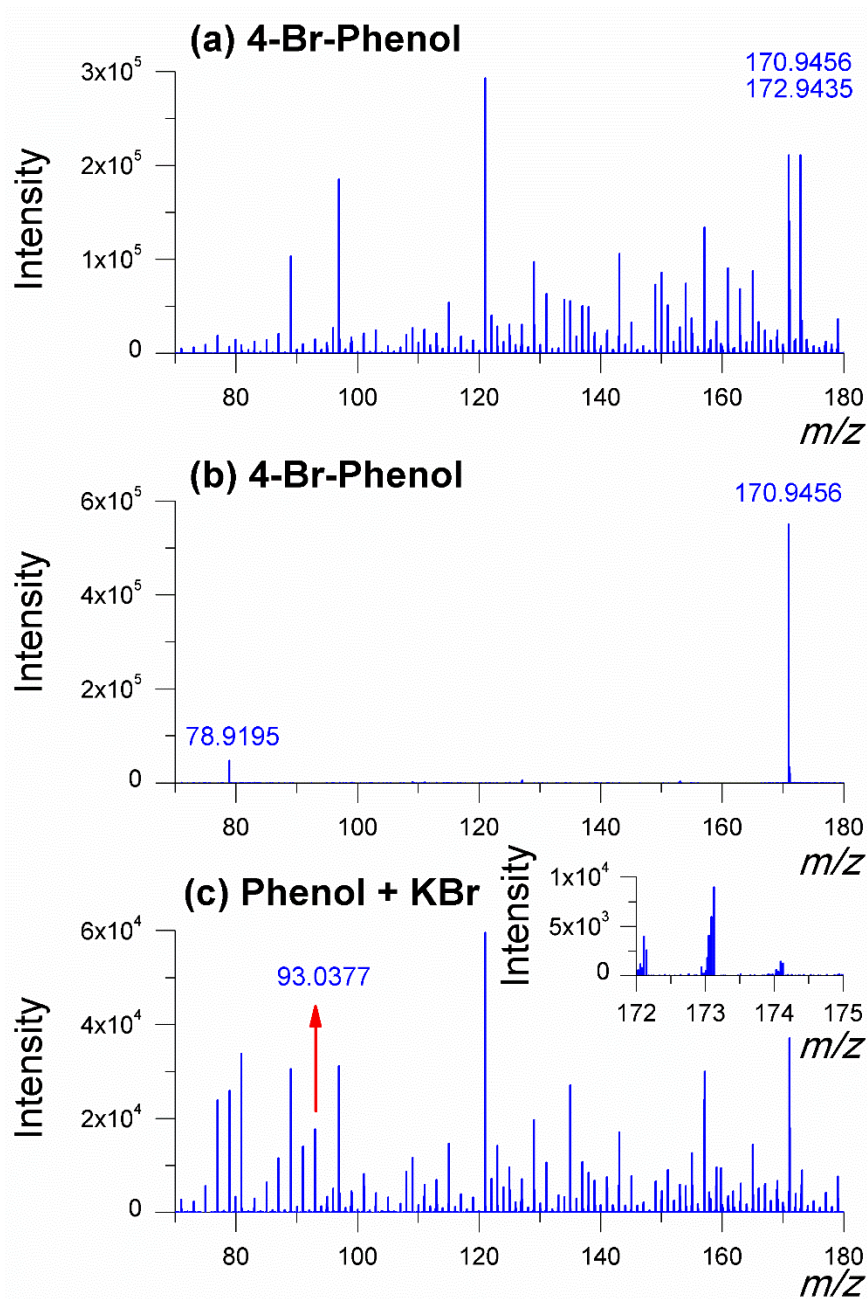

**Figure S8:** (a) Principal Component Analysis score plot on SML samples that were analyzed with both TM-DART-QTOF-MS and lab-to-the-field approach; samples that exhibited particle formation are shown with green squares, and samples that did not exhibit particle formation are shown with red squares. (b) Loadings plot associated to PC2 (B).

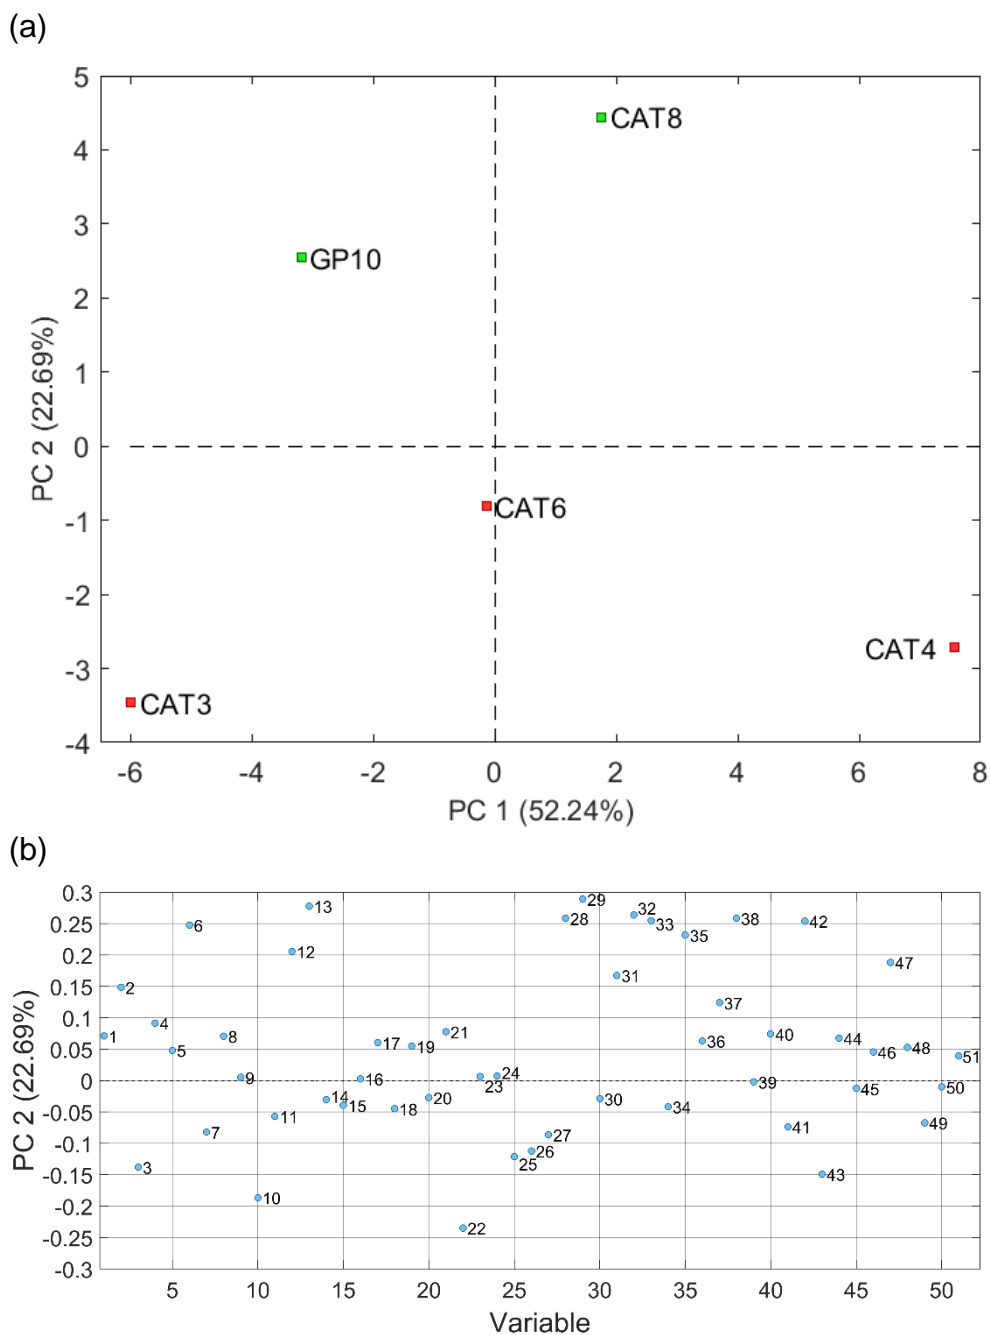



## Supporting References

Carpenter, L. J., Fleming, Z. L., Read, K. A., Lee, J. D., Moller, S. J., Hopkins, J. R., Purvis, R. M., Lewis, A. C., Müller, K., Heinold, B., Herrmann, H., Fomba, K. W., Pinxteren, D. van, Müller, C., Tegen, I., Wiedensohler, A., Müller, T., Niedermeier, N., Achterberg, E. P., Patey, M. D., Kozlova, E. A., Heimann, M., Heard, D. E., Plane, J. M. C., Mahajan, A., Oetjen, H., Ingham, T., Stone, D., Whalley, L. K., Evans, M. J., Pilling, M. J., Leigh, R. J., Monks, P. S., Karunaharan, A., Vaughan, S., Arnold, S. R., Tschritter, J., Pöhler, D., Frieß, U., Holla, R., Mendes, L. M., Lopez, H., Faria, B., Manning, A. J. and Wallace, D. W. R.: Seasonal characteristics of tropical marine boundary layer air measured at the Cape Verde Atmospheric Observatory, *J. Atmospheric Chem.*, 67(2–3), 87–140, doi:10.1007/s10874-011-9206-1, 2010.

Kang, E., Toohey, D. W. and Brune, W. H.: Dependence of SOA oxidation on organic aerosol mass concentration and OH exposure: experimental PAM chamber studies, *Atmospheric Chem. Phys.*, 11(4), 1837–1852, doi:https://doi.org/10.5194/acp-11-1837-2011, 2011.

Li, R., Palm, B. B., Ortega, A. M., Hlywiak, J., Hu, W., Peng, Z., Day, D. A., Knote, C., Brune, W. H., de Gouw, J. A. and Jimenez, J. L.: Modeling the Radical Chemistry in an Oxidation Flow Reactor: Radical Formation and Recycling, Sensitivities, and the OH Exposure Estimation Equation, *J. Phys. Chem. A*, 119(19), 4418–4432, doi:10.1021/jp509534k, 2015.

Palm, B. B., Campuzano-Jost, P., Ortega, A. M., Day, D. A., Kaser, L., Jud, W., Karl, T., Hansel, A., Hunter, J. F., Cross, E. S., Kroll, J. H., Peng, Z., Brune, W. H. and Jimenez, J. L.: In situ secondary organic aerosol formation from ambient pine forest air using an oxidation flow reactor, *Atmospheric Chem. Phys.*, 16(5), 2943–2970, doi:https://doi.org/10.5194/acp-16-2943-2016, 2016.

Peng, Z., Day, D. A., Stark, H., Li, R., Lee-Taylor, J., Palm, B. B., Brune, W. H. and Jimenez, J. L.: HO<sub>x</sub> radical chemistry in oxidation flow reactors with low-pressure mercury lamps systematically examined by modeling, *Atmospheric Meas. Tech.*, 8(11), 4863–4890, doi:https://doi.org/10.5194/amt-8-4863-2015, 2015.

Saukko, E., Lambe, A. T., Massoli, P., Koop, T., Wright, J. P., Croasdale, D. R., Pedernera, D. A., Onasch, T. B., Laaksonen, A., Davidovits, P., Worsnop, D. R. and Virtanen, A.: Humidity-dependent phase state of SOA particles from biogenic and anthropogenic precursors, *Atmospheric Chem. Phys.*, 12(16), 7517–7529, doi:https://doi.org/10.5194/acp-12-7517-2012, 2012.
